# Supplementary material for: Switchable ferroelectric photovoltaic effects in epitaxial h-RFeO3 thin films
Source: Royal Society of Chemistry journal article supplement (doi:10.1039/c7nr08666k), 2018-01-01
Supplement: c7nr08666k1.pdf [file c7nr08666k1.pdf]

## **Supplementary Information**

# **Switchable Ferroelectric Photovoltaic Effects in Epitaxial *h*-RFeO<sub>3</sub> Thin Films**

*Hyeon Han,<sup>a</sup> Donghoon Kim,<sup>a</sup> Sangmin Chae,<sup>b</sup> Jucheol Park,<sup>c</sup> Sang Yeol Nam,<sup>c,d</sup> Mingi Choi,<sup>e</sup> Kijung Yong,<sup>e</sup> Hyo Jung Kim,<sup>b</sup> Junwoo Son,<sup>\*a</sup> and Hyun Myung Jang<sup>\*a</sup>*

<sup>a</sup>Department of Materials Science and Engineering, and Division of Advanced Materials Science, Pohang University of Science and Technology (POSTECH), Pohang 37673, Republic of Korea

<sup>b</sup>Department of Organic Material Science and Engineering, Pusan National University, Busan 46241, Republic of Korea

<sup>c</sup>Gyeongbuk Science & Technology Promotion Center, Gumi Electronics & Information Technology Research Institute, Gumi 39171, Republic of Korea

<sup>d</sup>Department of Materials Science and Engineering, Kumoh National Institute of Technology, Gumi 39177, Republic of Korea

<sup>e</sup>Department of Chemical Engineering, Pohang University of Science and Technology (POSTECH), Pohang 37673, Republic of Korea

**\* Corresponding Author**

E-mail: [jwson@postech.ac.kr](mailto:jwson@postech.ac.kr) (J. Son) or [hmjang@postech.ac.kr](mailto:hmjang@postech.ac.kr) (H. M. Jang)

## Section 1. Supplementary Figures & Tables

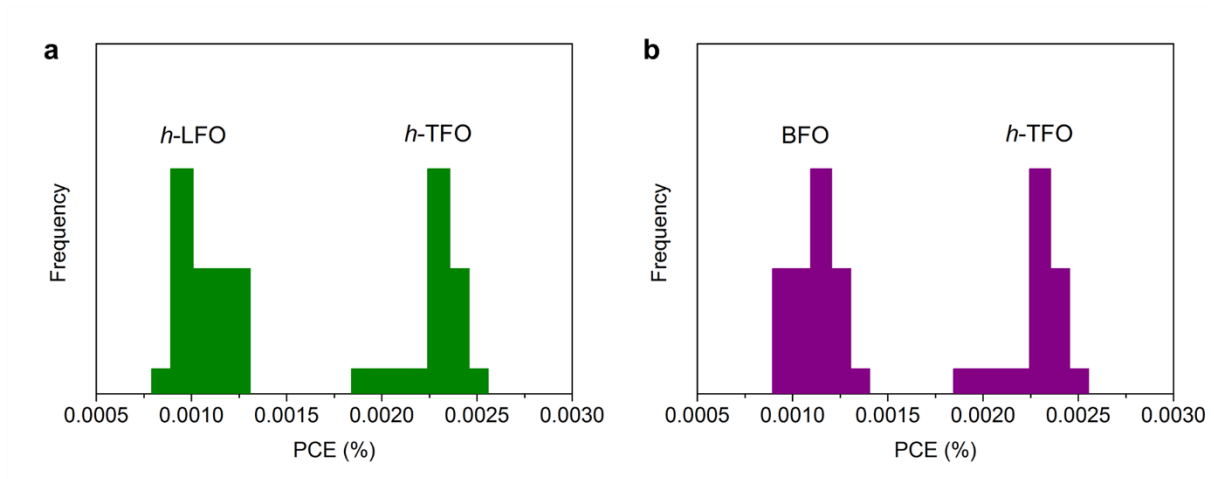

**Figure S1.** Distribution of power conversion efficiency (PCE) for (a) *h*-TFO and *h*-LFO devices, and (b) *h*-TFO and BFO devices.  $N = 10$  samples are measured for each devices.

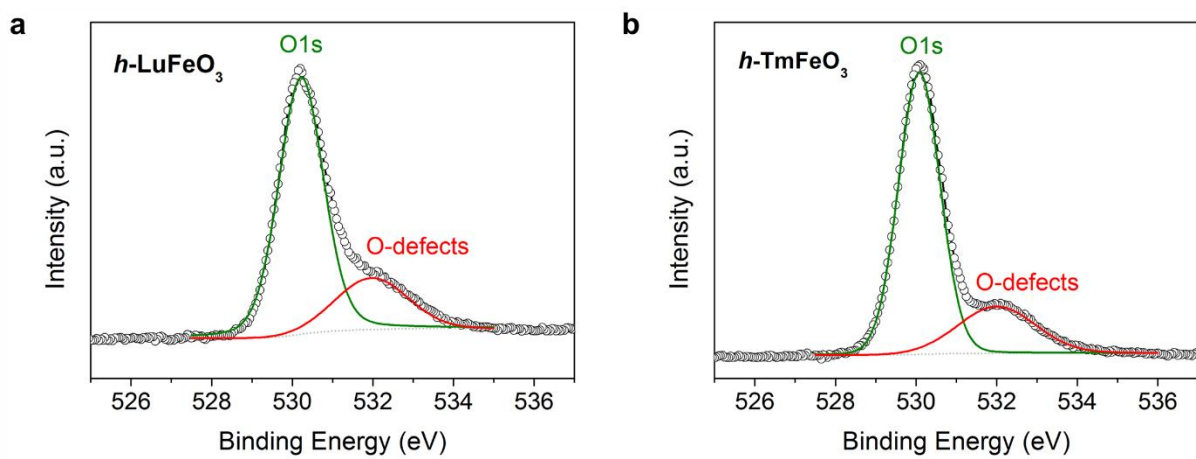

**Figure S2.** X-ray photoelectron spectra (XPS) of the (a)  $h\text{-LFO}$  and (b)  $h\text{-TFO}$  thin films. The deconvolution of the O1s line results in two peaks of the oxygen (green line) in the  $h\text{-RFO}$  lattice and the oxygen defects (red line).

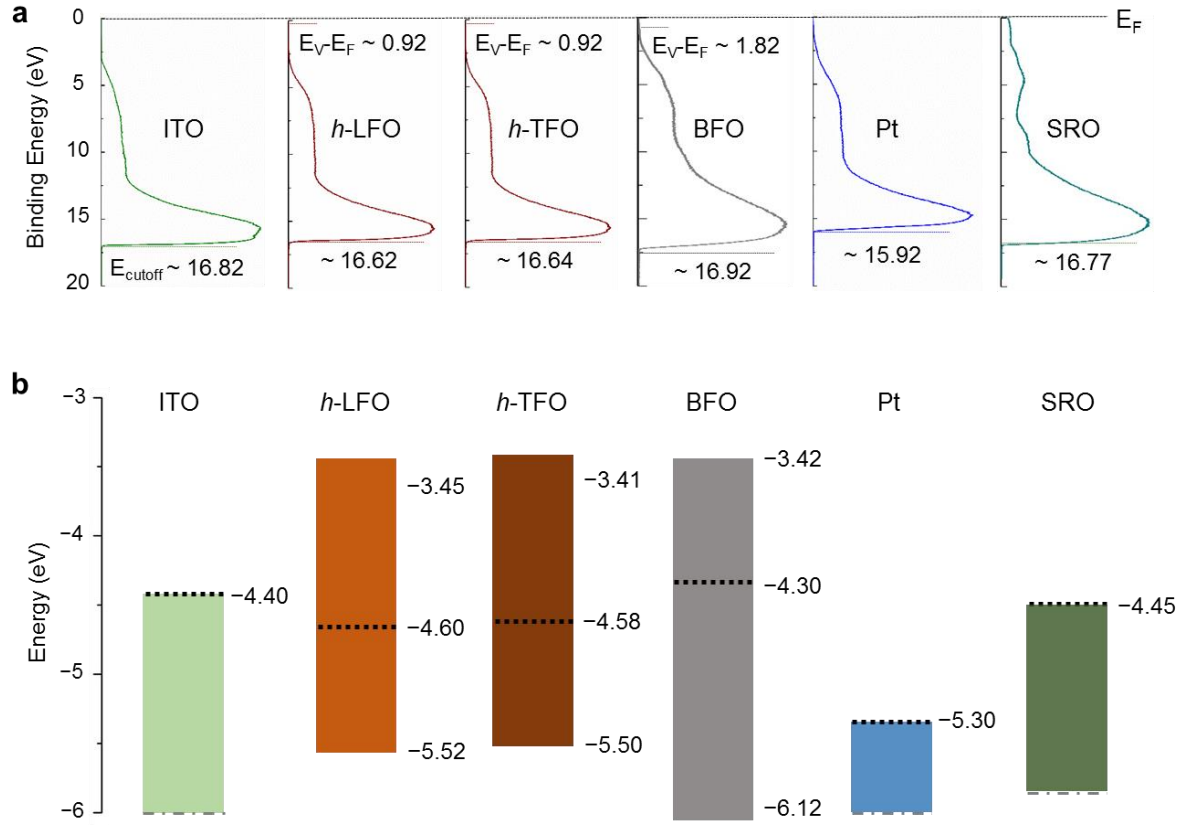

**Figure S3.** (a) UPS spectra of ITO, *h*-LFO, *h*-TFO, BFO, Pt, and SRO (from the left to the right-hand-side). A low binding-energy region is for the valance-band determination and a high binding-energy region for the work-function determination. (b) An energy level diagram showing the conduction-band minimum, valence-band maximum, and the Fermi level (a dashed line) of each constituting materials.

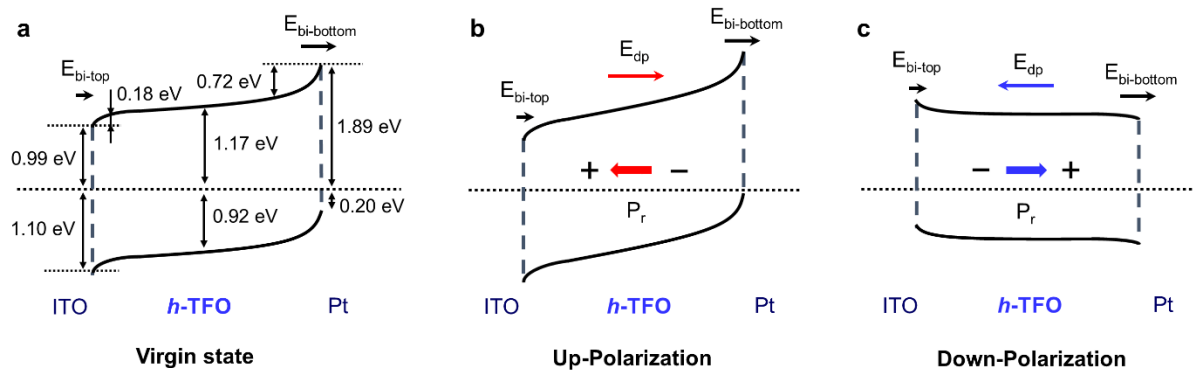

**Figure S4.** Modulated energy band diagrams of the ITO/h-TFO/Pt device. From the left, the virgin state (without poling), the up-polarization state (under upward poling), and the down-polarization state (under downward poling) are shown.

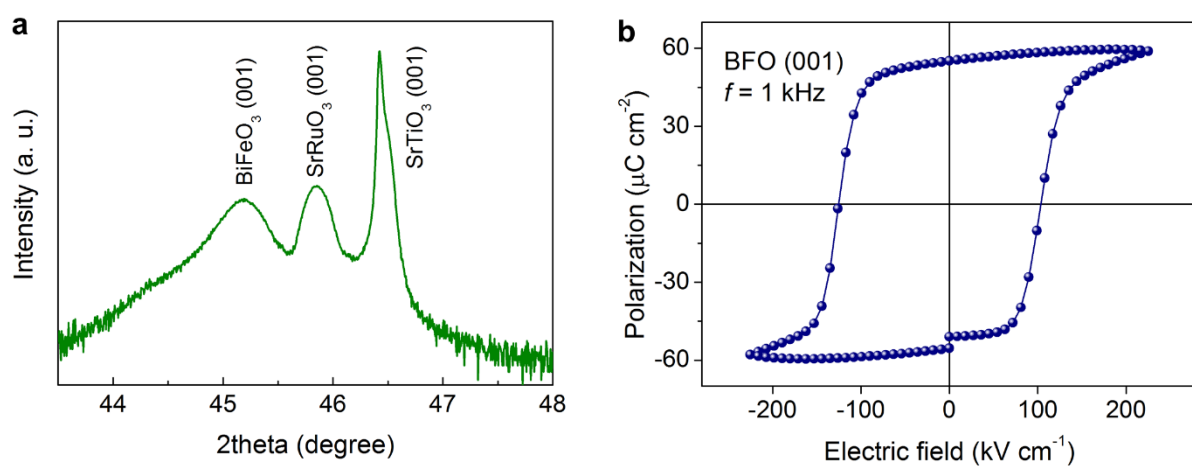

**Figure S5.** (a) Theta–2theta ( $\theta$ – $2\theta$ ) X-ray diffraction (XRD) pattern of the preferential [001]-oriented BiFeO<sub>3</sub> thin film grown on SrRuO<sub>3</sub> (001)/SrTiO<sub>3</sub> (001) substrate. (b) A polarization-electric field ( $P$ - $E$ ) hysteresis loop of the 250-nm-thick (001)-oriented BiFeO<sub>3</sub> (BFO) layer obtained at 300 K, 1 kHz.

## Section 2. Interpretation of the thickness-dependent $V_{oc}$

As shown in Fig. 4a and 4b, the photocurrent tends to increase with decreasing film thickness. This is because both the depolarization field effect and the Schottky-junction barrier effect increase with decreasing film thickness. However, similar to the previously reported paper (*Chem. Mater.* 2015, **27**, 7425),  $V_{oc}$  does not change significantly for the film thickness above ~150 nm. In other words, the depolarization field weakens with increasing film thickness. According to the **bulk** photovoltaic (BPV) effect, on the contrary,  $V_{oc}$  increases with the film thickness (or with the electrode distance), according to the following simple equation (*Nat. Nanotech.* 2010, **5**, 143–147; *J. Mater. Chem. A* 2014, **2**, 6027):  $V_{OC} = Ed$ . Therefore, it is considered that the thickness dependent  $V_{oc}$  **is a consequence of the trade-off** between the depolarization field effect and the BPV effect.

Furthermore, *S. Y. Yang et al.* described that  $V_{oc}$  essentially remains constant even if the film thickness increases further because the photovoltaic response primarily occurs within a depletion layer having the thickness of several hundred nano-meters (*Appl. Phys. Lett.* 2009, **95**, 062909).
